# Supplementary material for: Self-aggregation of synthetic zinc chlorophyll derivatives possessing multi-perfluoroalkyl chains in perfluorinated solvents
Source: Royal Society of Chemistry journal article supplement (doi:10.1039/b702866k), 2007-05-08
Supplement: b702866k.pdf [file b702866k.pdf]

## Electronic Supporting Information

### Self-aggregation of synthetic chlorophyll derivatives possessing multi-perfluoroalkyl chains in perfluorinated solvents

Reiko Shibata,<sup>a</sup> Tadashi Mizoguchi,<sup>a</sup> Toshiyuki Inazu<sup>b</sup> and Hitoshi Tamiaki\*<sup>a</sup>

<sup>a</sup> *Department of Bioscience and Biotechnology, Faculty of Science and Engineering, Ritsumeikan University, Kusatsu, Shiga, 525-8577, Japan*

<sup>b</sup> *Department of Applied Chemistry, School of Engineering, and Institute of Glycotechnology, Tokai University, Hiratsuka, Kanagawa, 295-1292, Japan*

#### Contents

|                   |                                                      |    |
|-------------------|------------------------------------------------------|----|
| <b>Figure S1.</b> | TOF-MS spectrum of compound <b>14</b> .              | S2 |
| <b>Figure S2.</b> | <sup>19</sup> F-NMR spectrum of compound <b>14</b> . | S3 |

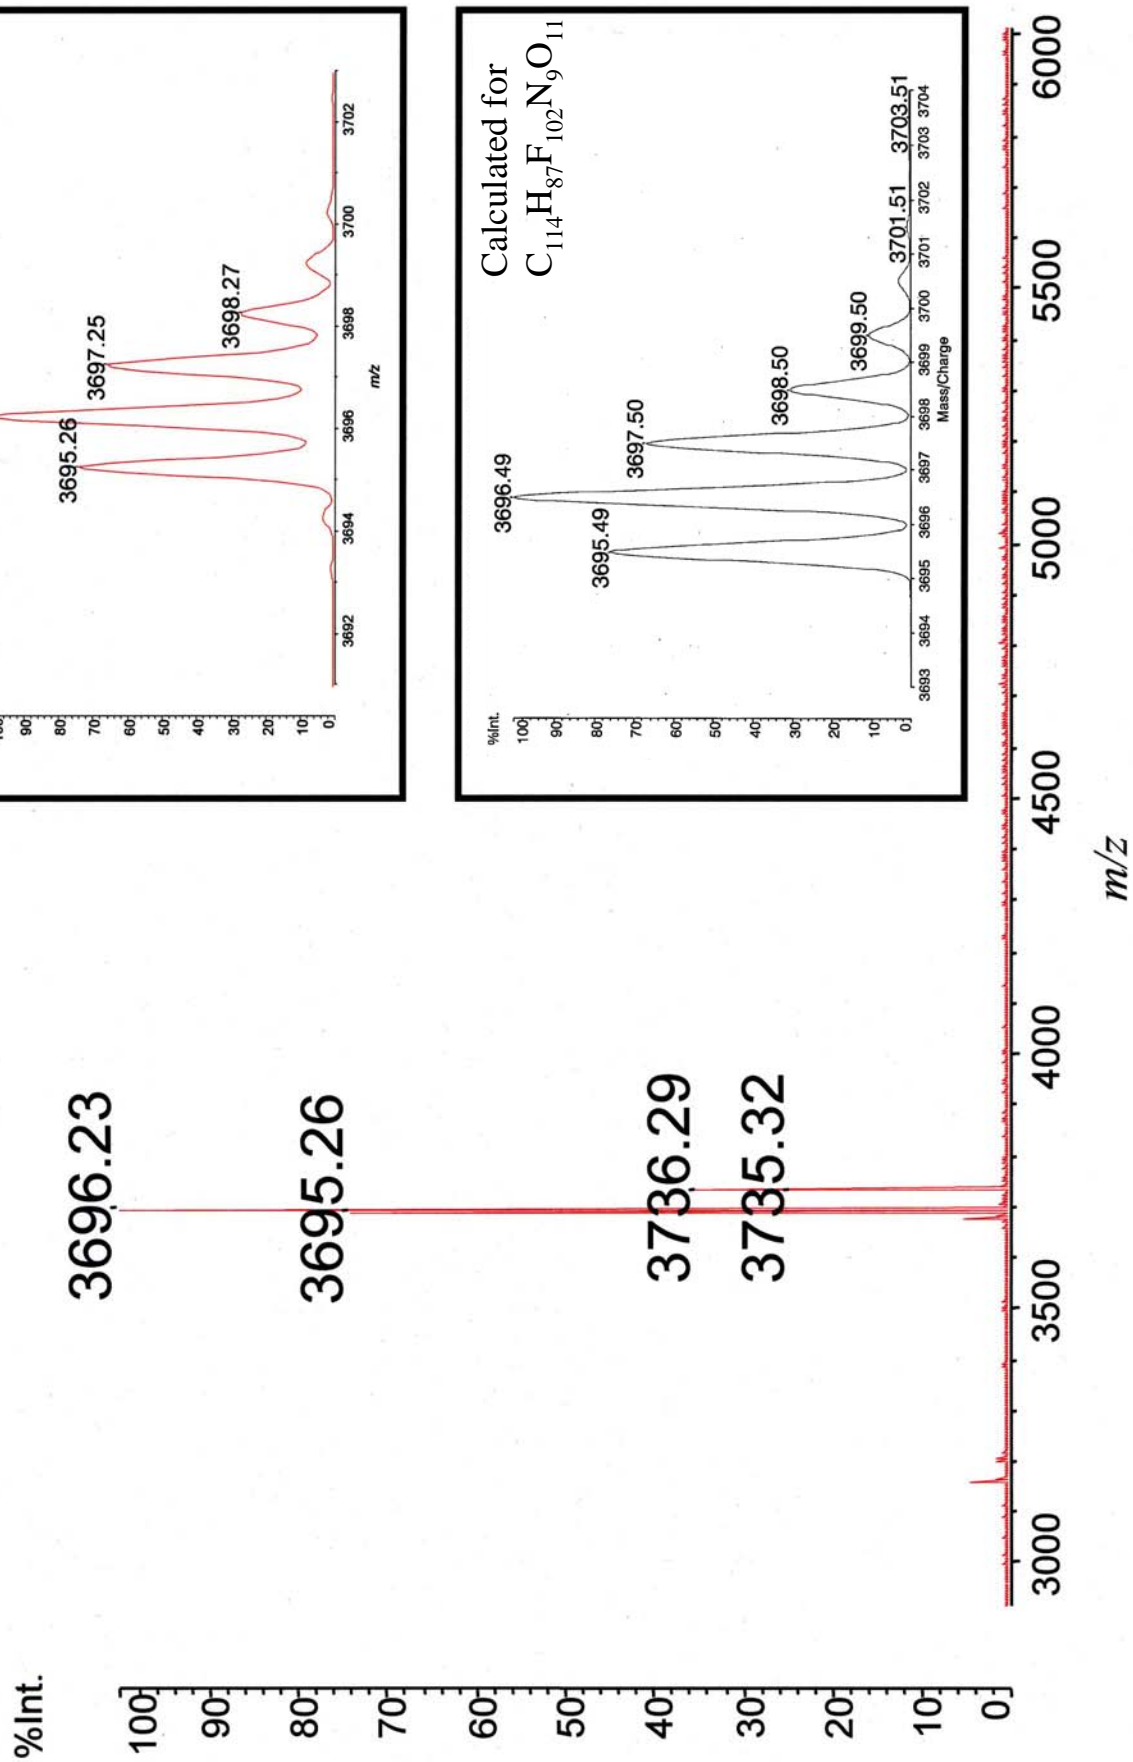

**Figure S1.** TOF-MS spectrum of compound **14**.

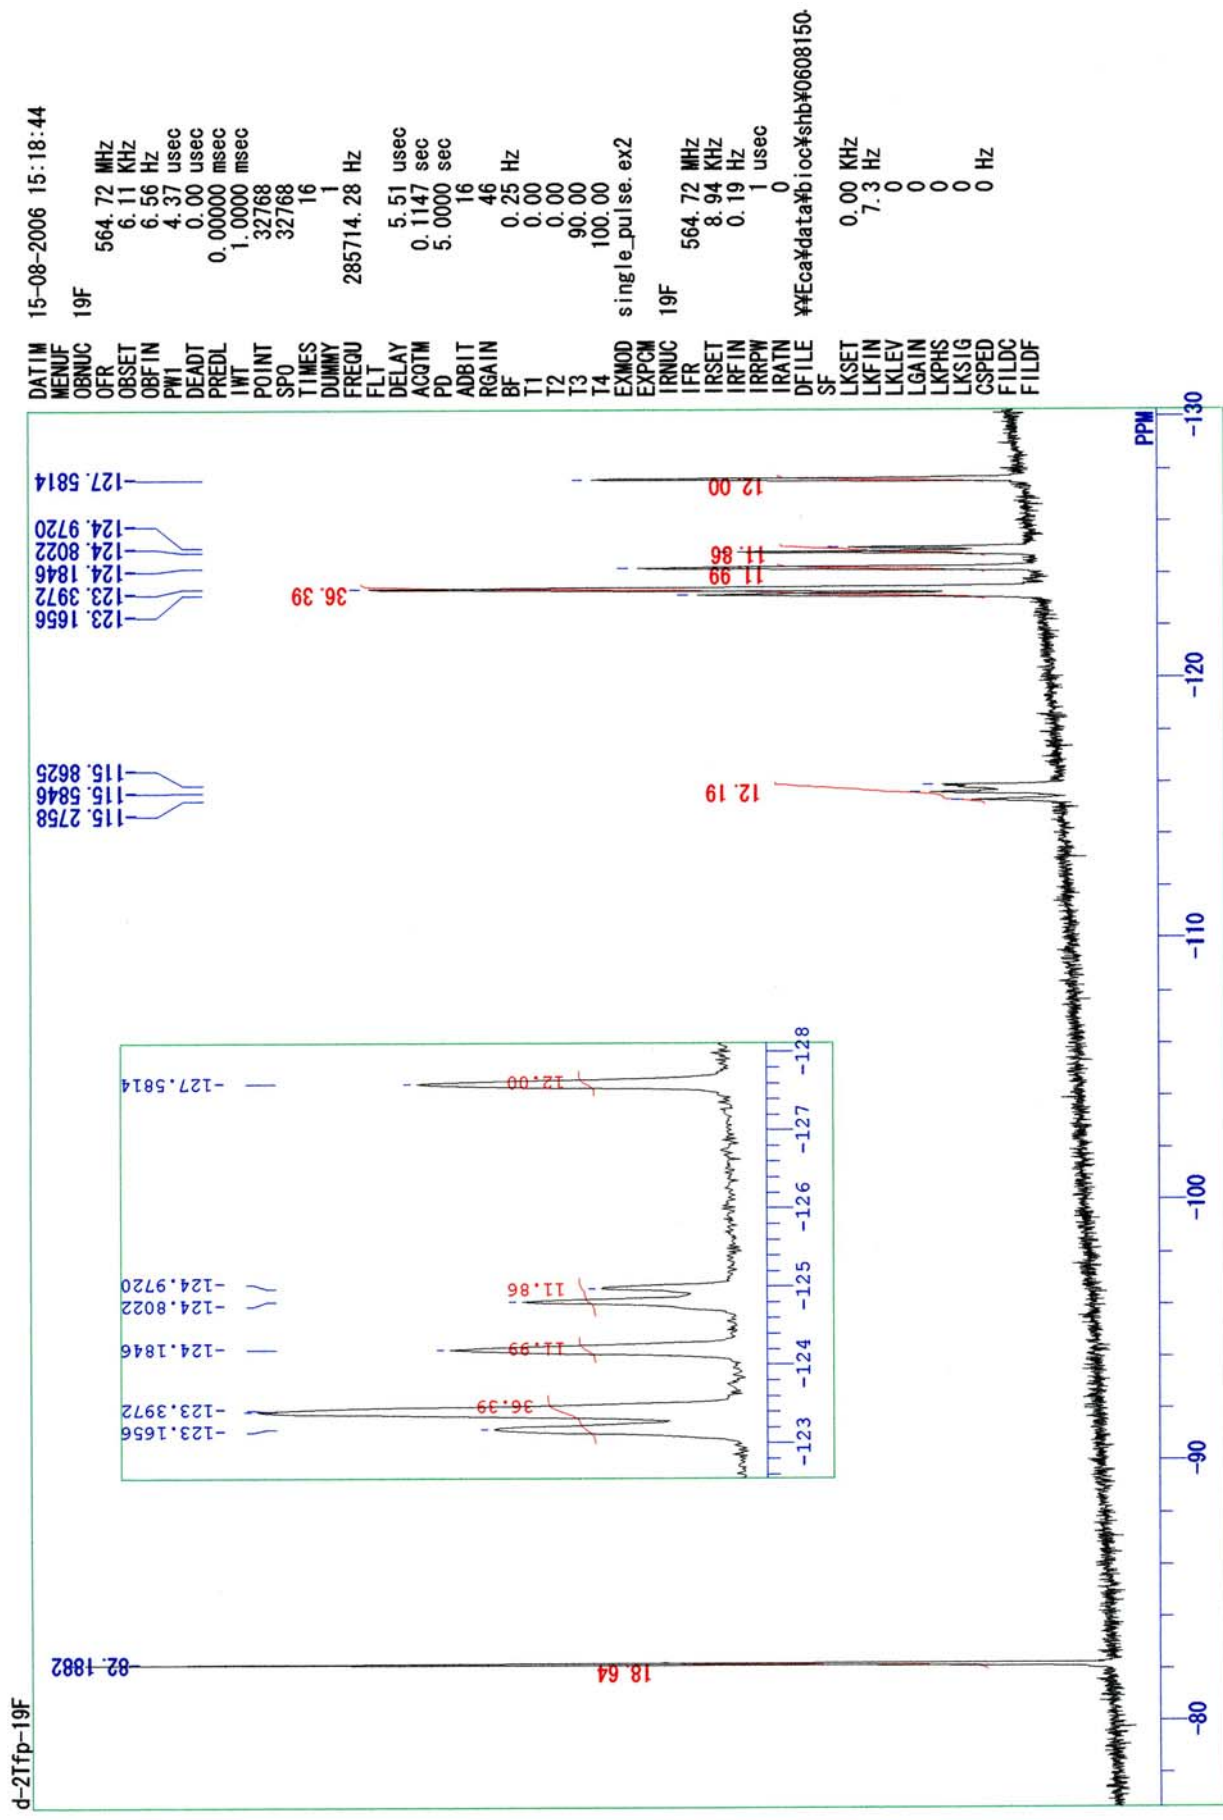

Figure S2. <sup>19</sup>F-NMR spectrum of compound 14.
